# Supplementary material for: Enhancement of the Anticancer Ability of Natural Killer Cells through Allogeneic Mitochondrial Transfer
Source: MDPI journal article supplement (doi:10.3390/cancers15123225), 2023-06-17
Supplement: s1 [file s1]

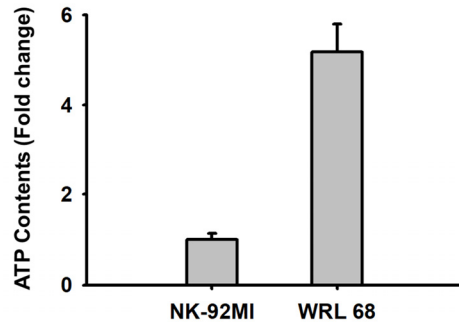

**Figure S1.** Comparison of the ATP contents of NK-92MI and WRL-68 cells.

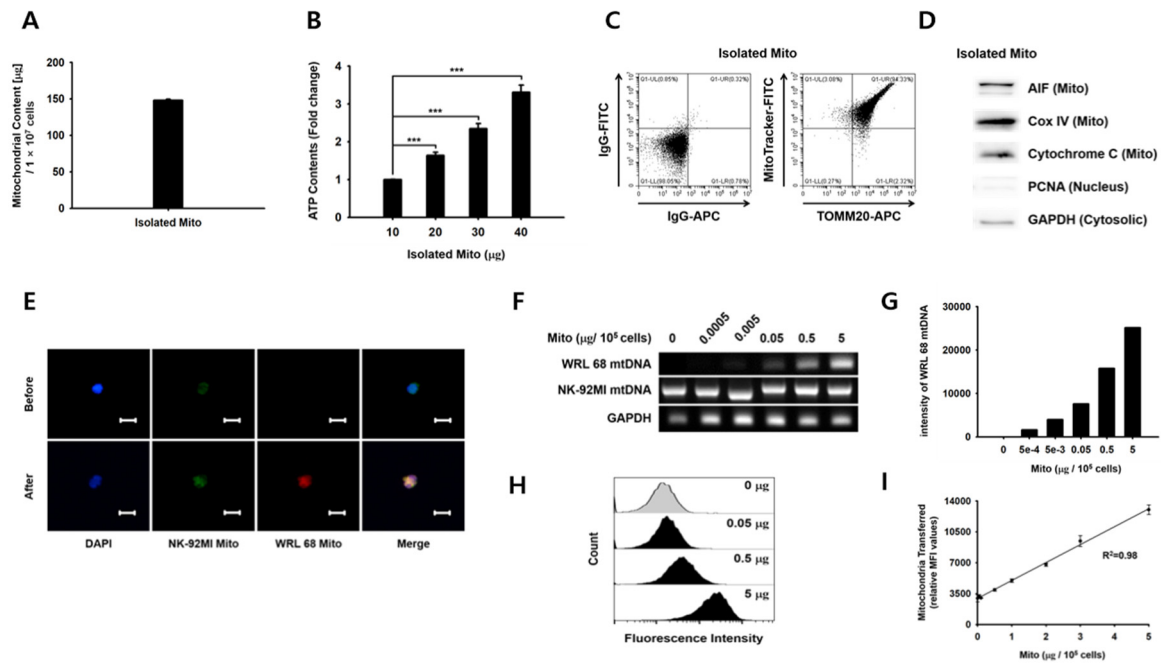

**Figure S2. (A–I)** Characterization of the mitochondria isolated from WRL-68 cells.

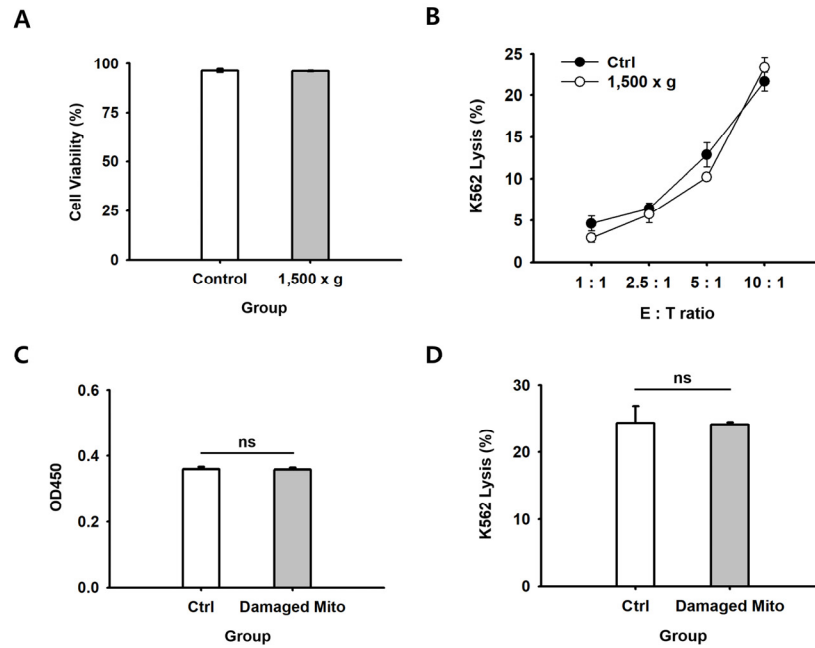

**Figure S3. (A–D)** The enhancement of the anticancer ability of NK-92MI cells is independent of centrifugal stimulation or the presence of damaged mitochondria.

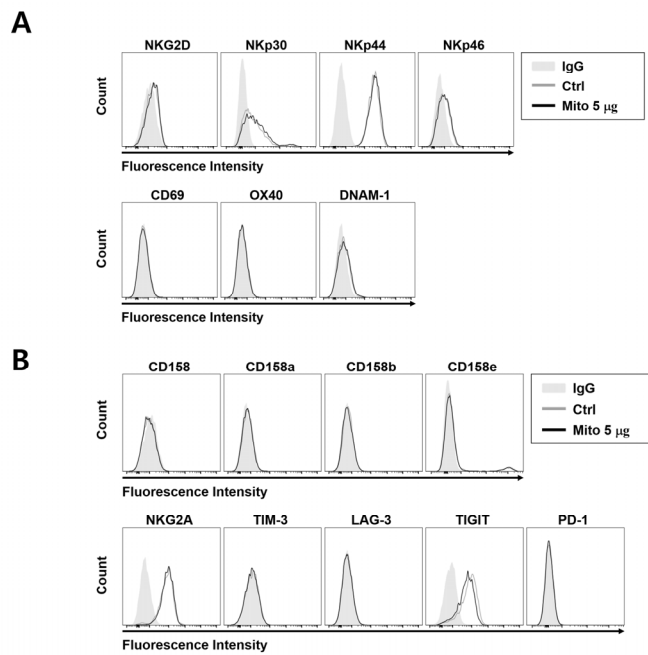

**Figure S4. (A,B)** Phenotypic analysis of NK-92MI cells 48 h after mitochondrial transfer.

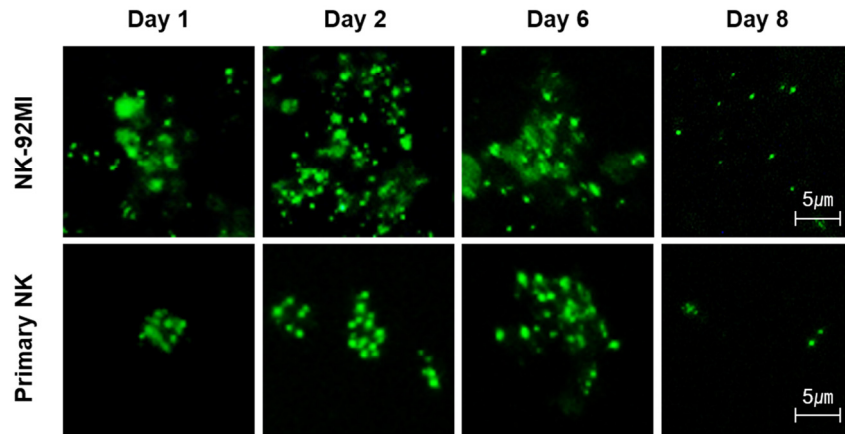

Figure S5. Stability of the transferred mitochondria.

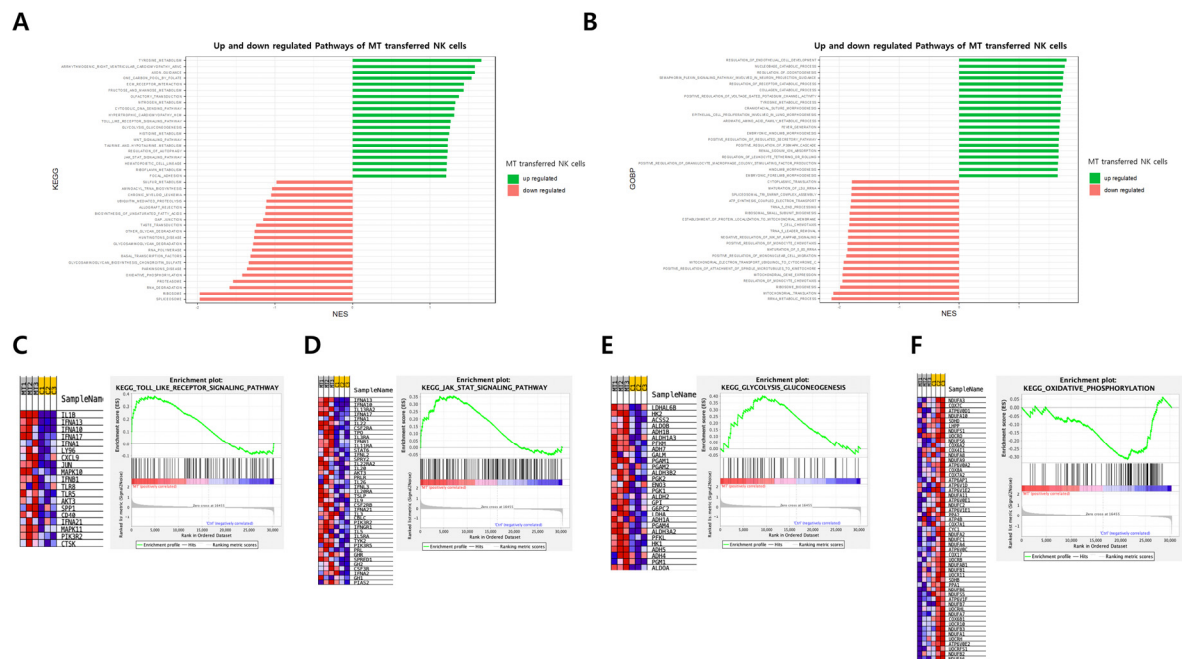

Figure S6. (A-F) Changes in gene expression profiling of NK-92MI cells after mitochondrial transfer.
